# Supplementary material for: Storage in the deep aquifer: stochastic process in time and frequency domain using groundwater level response to seismic activation of the earthquake, Tohoku, Japan, 2001
Source: Research Square preprint supplement (doi:10.21203/rs.3.rs-1988397/v1), 2023-04-19
Supplement: Supplementary file 1 [file 0729ebf8cef59bd6082f7d76.docx]

Table 1

Information of groundwater and seismogram monitoring station

| Type | Station | N  (degree) | E  (degree) | Altitude*  (m) | Distance to event  (km) | Geology of seismogram |
| --- | --- | --- | --- | --- | --- | --- |
| HONSHU event |  | 38.322 | 142.369 | -32000.0 |  |  |
| Seismogram | NANB | 24.4275 | 121.7498 | 112 | 2494.172 | Sedimentary Rock |
| HWAH | 23.9770 | 121.6056 | -294 | 2539.622 | Alluvial deposits |
| WGK | 23.6844 | 120.5703 | 75 | 2639.646 | Sedimentary rock |
| TPUB | 23.3005 | 120.6296 | 370 | 2664.807 | Siltstone |
| SGS | 23.0804 | 120.5908 | 278 | 2684.831 | Sedimentary rock |
| MASB | 22.6119 | 120.6328 | 139 | 2718.535 | − |
| Groundwater |  | | | | | Control  seismogram station |
| TUN | 24.744 | 121.790 | 3.8 | 2467.087 | NANB |
| HWA | 23.975 | 121.613 | 16.1 | 2539.172 | HWAH |
| DON | 23.685 | 120.570 | 75.4 | 2639.636 | WGK |
| LIU | 23.226 | 120.351 | 26.9 | 2691.505 | TPUB |
| NAB | 23.069 | 120.349 | 42.8 | 2703.770 | SGS |
| CHI | 22.592 | 120.614 | 26.8 | 2721.432 | MASB |

(*Altitude for groundwater is the level of top of casing.)
