# Supplementary material for: Storage in the deep aquifer: stochastic process in time and frequency domain using groundwater level response to seismic activation of the earthquake, Tohoku, Japan, 2001
Source: Research Square preprint supplement (doi:10.21203/rs.3.rs-1988397/v1), 2023-04-19
Supplement: Supplementary file 2 [file a3bd0024471dbb3fd5e52c7e.docx]

Table 3

Storage coefficient inferred from Rayleigh waves

| Station | Significant period  (s) | Wave velocity (km/s) | Wave length  (km) | Auto spectra (cm2/Hz) | | Storage coefficient | Specific storage  (m-1) |
| --- | --- | --- | --- | --- | --- | --- | --- |
| Groundwater head | Vertical displacement in seismogram |
| TUN | 25.6 | 3.171 | 81.179 | 1.59 | 4.18 | 2.189×10-3 | 1.152×10-4 |
| HWA | 25.6 | 3.264 | 83.551 | 9.15 | 4.61 | 1.176×10-3 | 4.900×10-5 |
| DON | 25.6 | 3.219 | 82.408 | 1.76 | 5.93 | 3.854×10-5 | 1.285×10-6 |
| LIU | 32.0 | 3.460 | 110.705 | 1.20 | 2.76 | 3.600×10-3 | 8.571×10-5 |
| NAB | 32.0 | 3.359 | 107.479 | 1.03 | 2.65 | 7.747×10-5 | 8.608×10-6 |
| CHI | 21.3 | 3.021 | 64.336 | 6.56 | 5.54 | 6.513×10-4 | 2.605×10-5 |
