# Supplementary material for: Storage in the deep aquifer: stochastic process in time and frequency domain using groundwater level response to seismic activation of the earthquake, Tohoku, Japan, 2001
Source: Research Square preprint supplement (doi:10.21203/rs.3.rs-1988397/v1), 2023-04-19
Supplement: Supplementary file 3 [file ed449b4901b77cc9ba551793.docx]

Table 2

Information of groundwater well and aquifer

| Station | Screen interval (m) | Well length  (m) | Aquifer thickness (m) | Storage coefficient | Aquifer/soil type |
| --- | --- | --- | --- | --- | --- |
| TUN | 130-150 | 180 | 19 | − | Confined/sand |
| HWA | 161-185 | 191 | 24 | 6.184×10-3 * | Confined/gravel |
| DON | 222-252 | 270 | 30 | − | Confined/gravel |
| LIU | 204-222 | 250 | 42 | − | Confined/sand |
| NAB | 135-147 | 250 | 9 | 2.959×10-5 # | Confined/sand |
| CHI | 158-170 | 251 | 17 | − | Confined/gravel |
| 183-191 | 8 | − | Confined/gravel |

(*Shih, 2009; #Shih, 2018; − Lack of data; diameter of well is 0.1524 m)
